# Supplementary material
Source: PubMed Central journal article supplement (PMC5325763)

**Figure S1. Linking differential chaperone engagement to the severity of protein-folding mutations (related to Figure 1)**

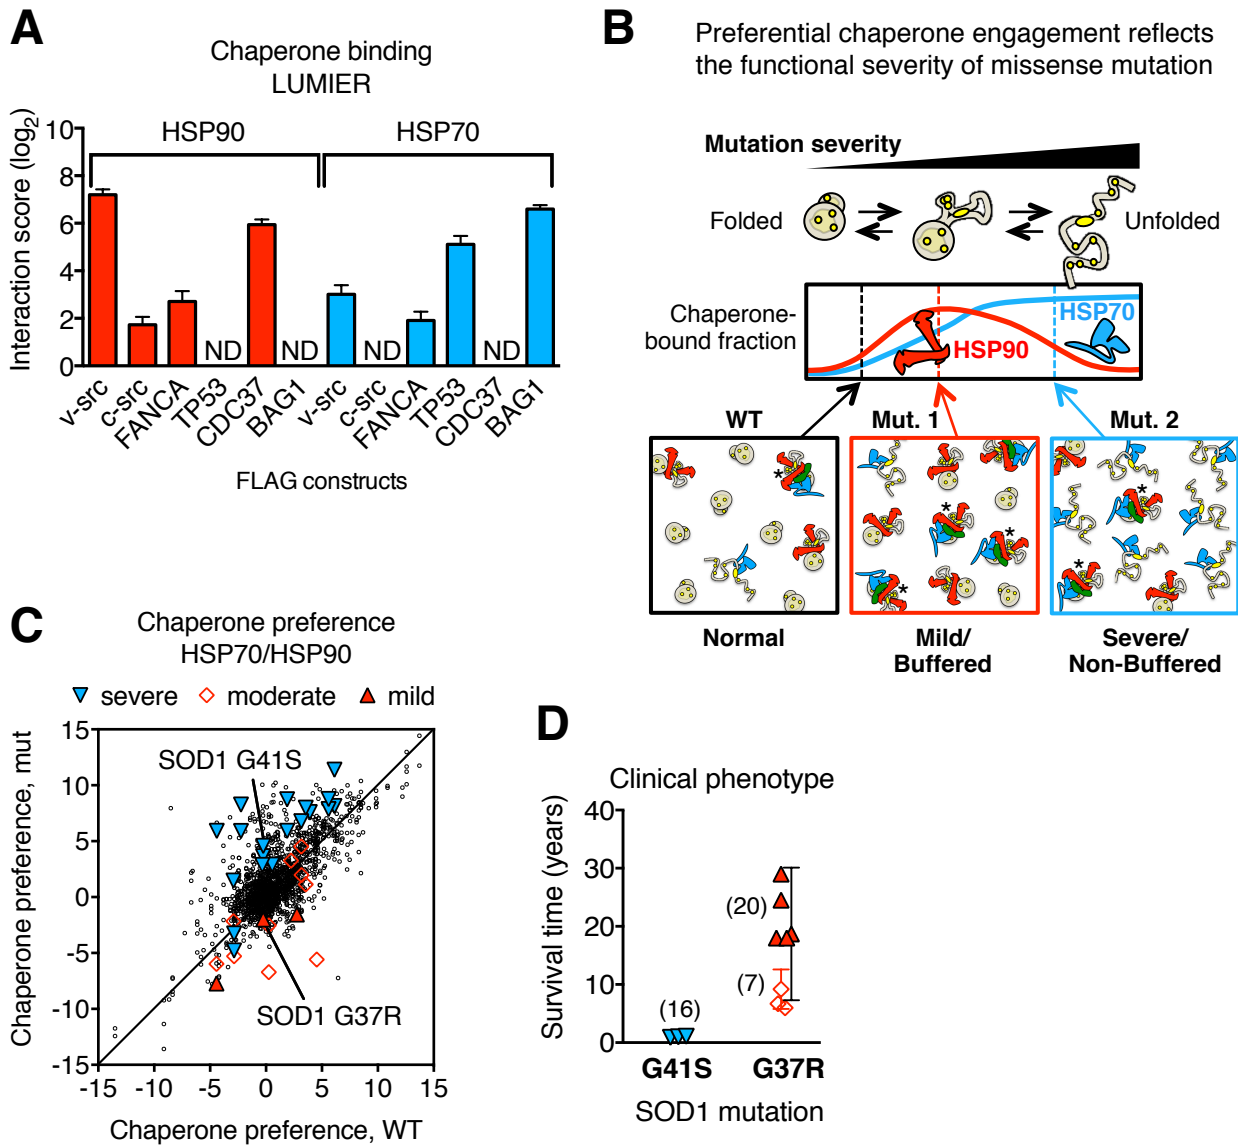

Supplement: NIHMS846502-supplement-1.pdf [file NIHMS846502-supplement-1.pdf]
