# Supplementary material
Source: PubMed Central journal article supplement (PMC5325763)

**Figure S2. Determining the functional significance of differential chaperone engagement to FANCA variant proteins (related to Figure 2)**

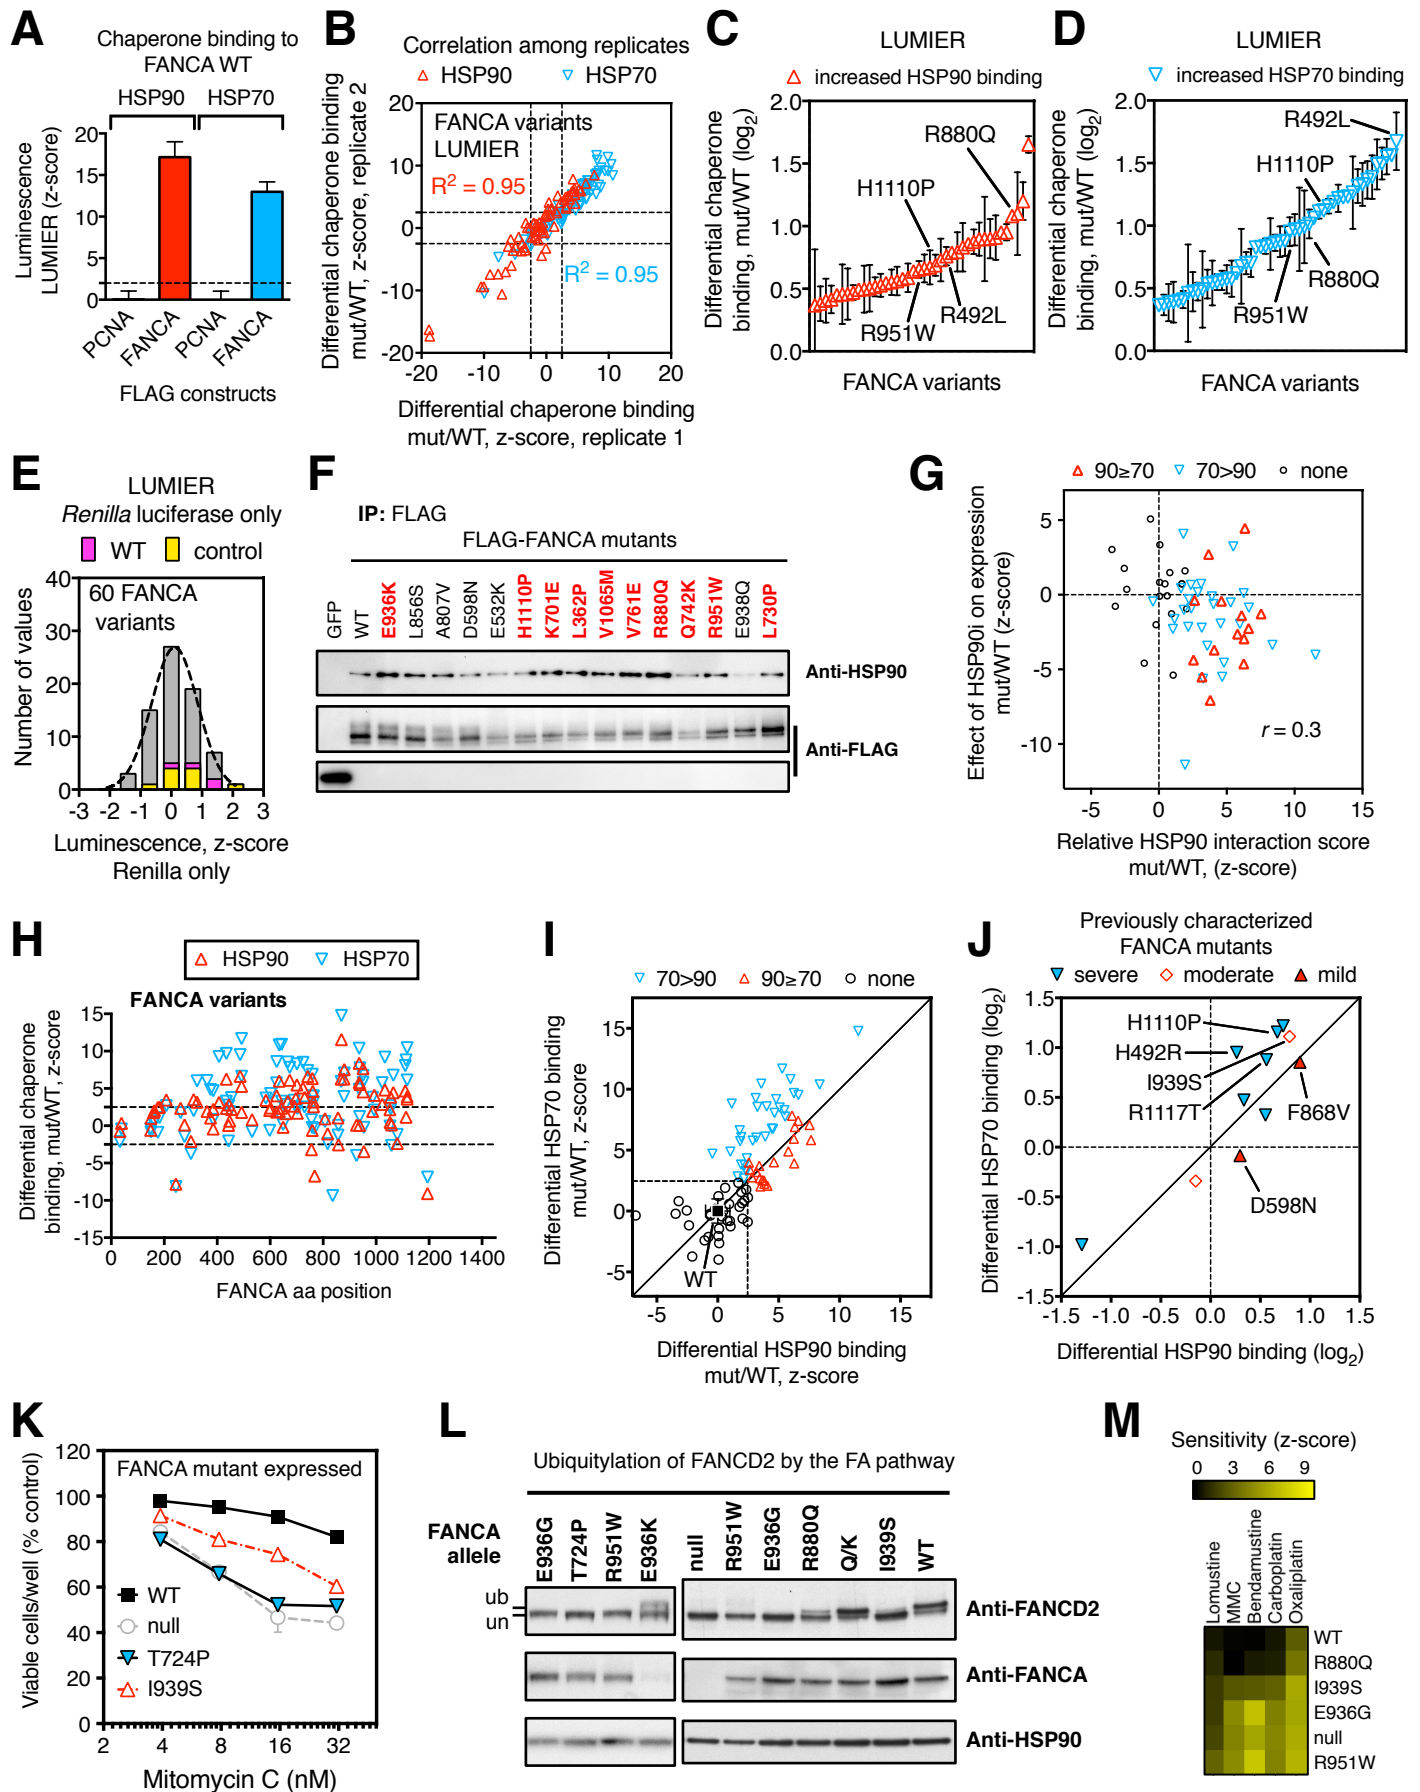

Supplement: NIHMS846502-supplement-2.pdf [file NIHMS846502-supplement-2.pdf]
