# Supplementary material
Source: PubMed Central journal article supplement (PMC5325763)

**Figure S3. FANCA mutations alter the sensitivity of FA pathway function to low-level HSP90 inhibition (related to Figure 3)**

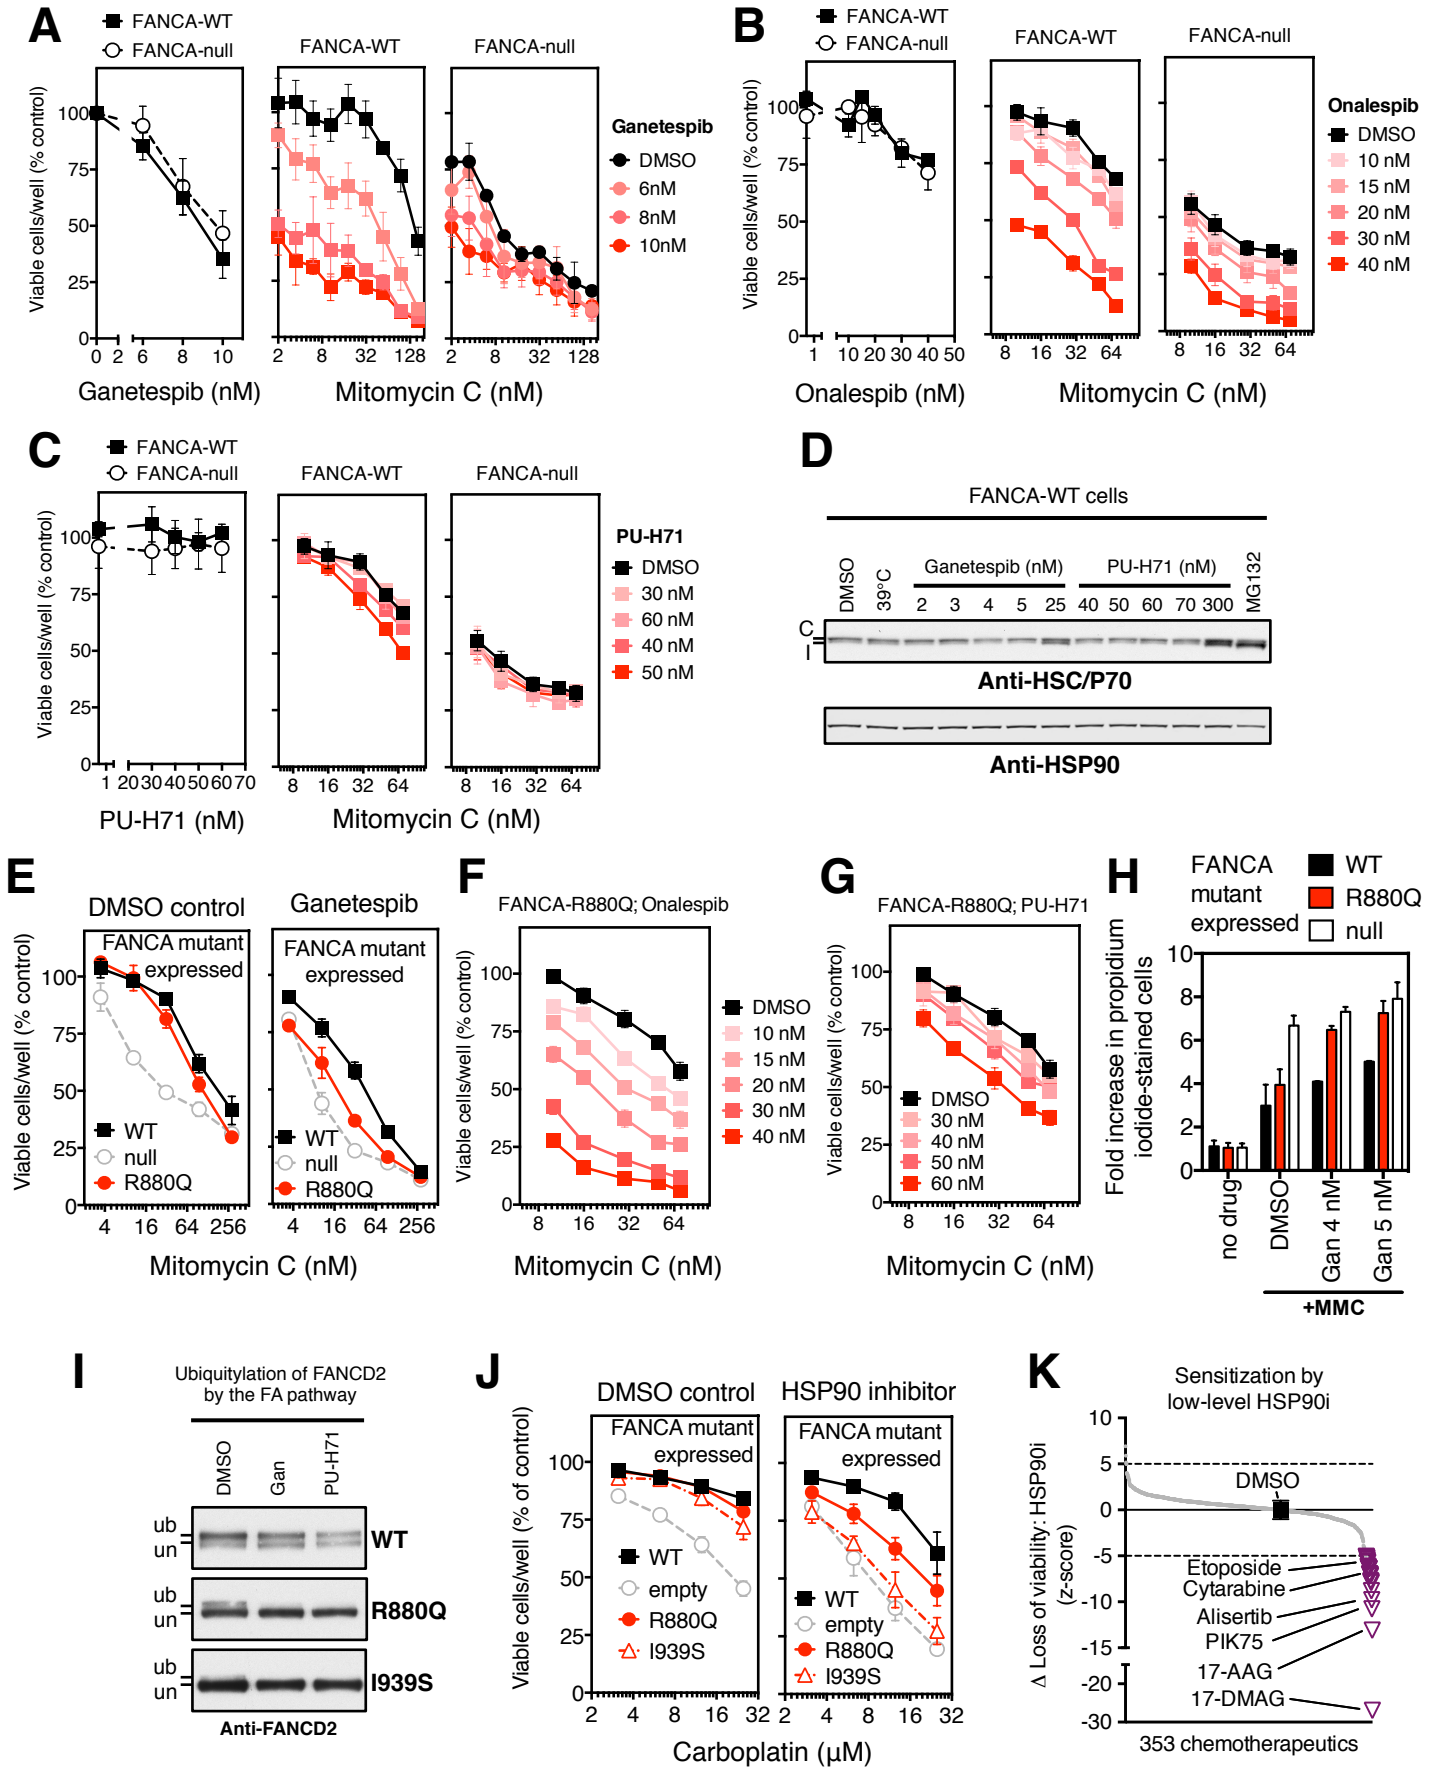

Supplement: NIHMS846502-supplement-3.pdf [file NIHMS846502-supplement-3.pdf]
