# Supplementary material
Source: PubMed Central journal article supplement (PMC5325763)

**Figure S4. Mutant-specific effects of increased temperatures on FA pathway function (related to Figure 4)**

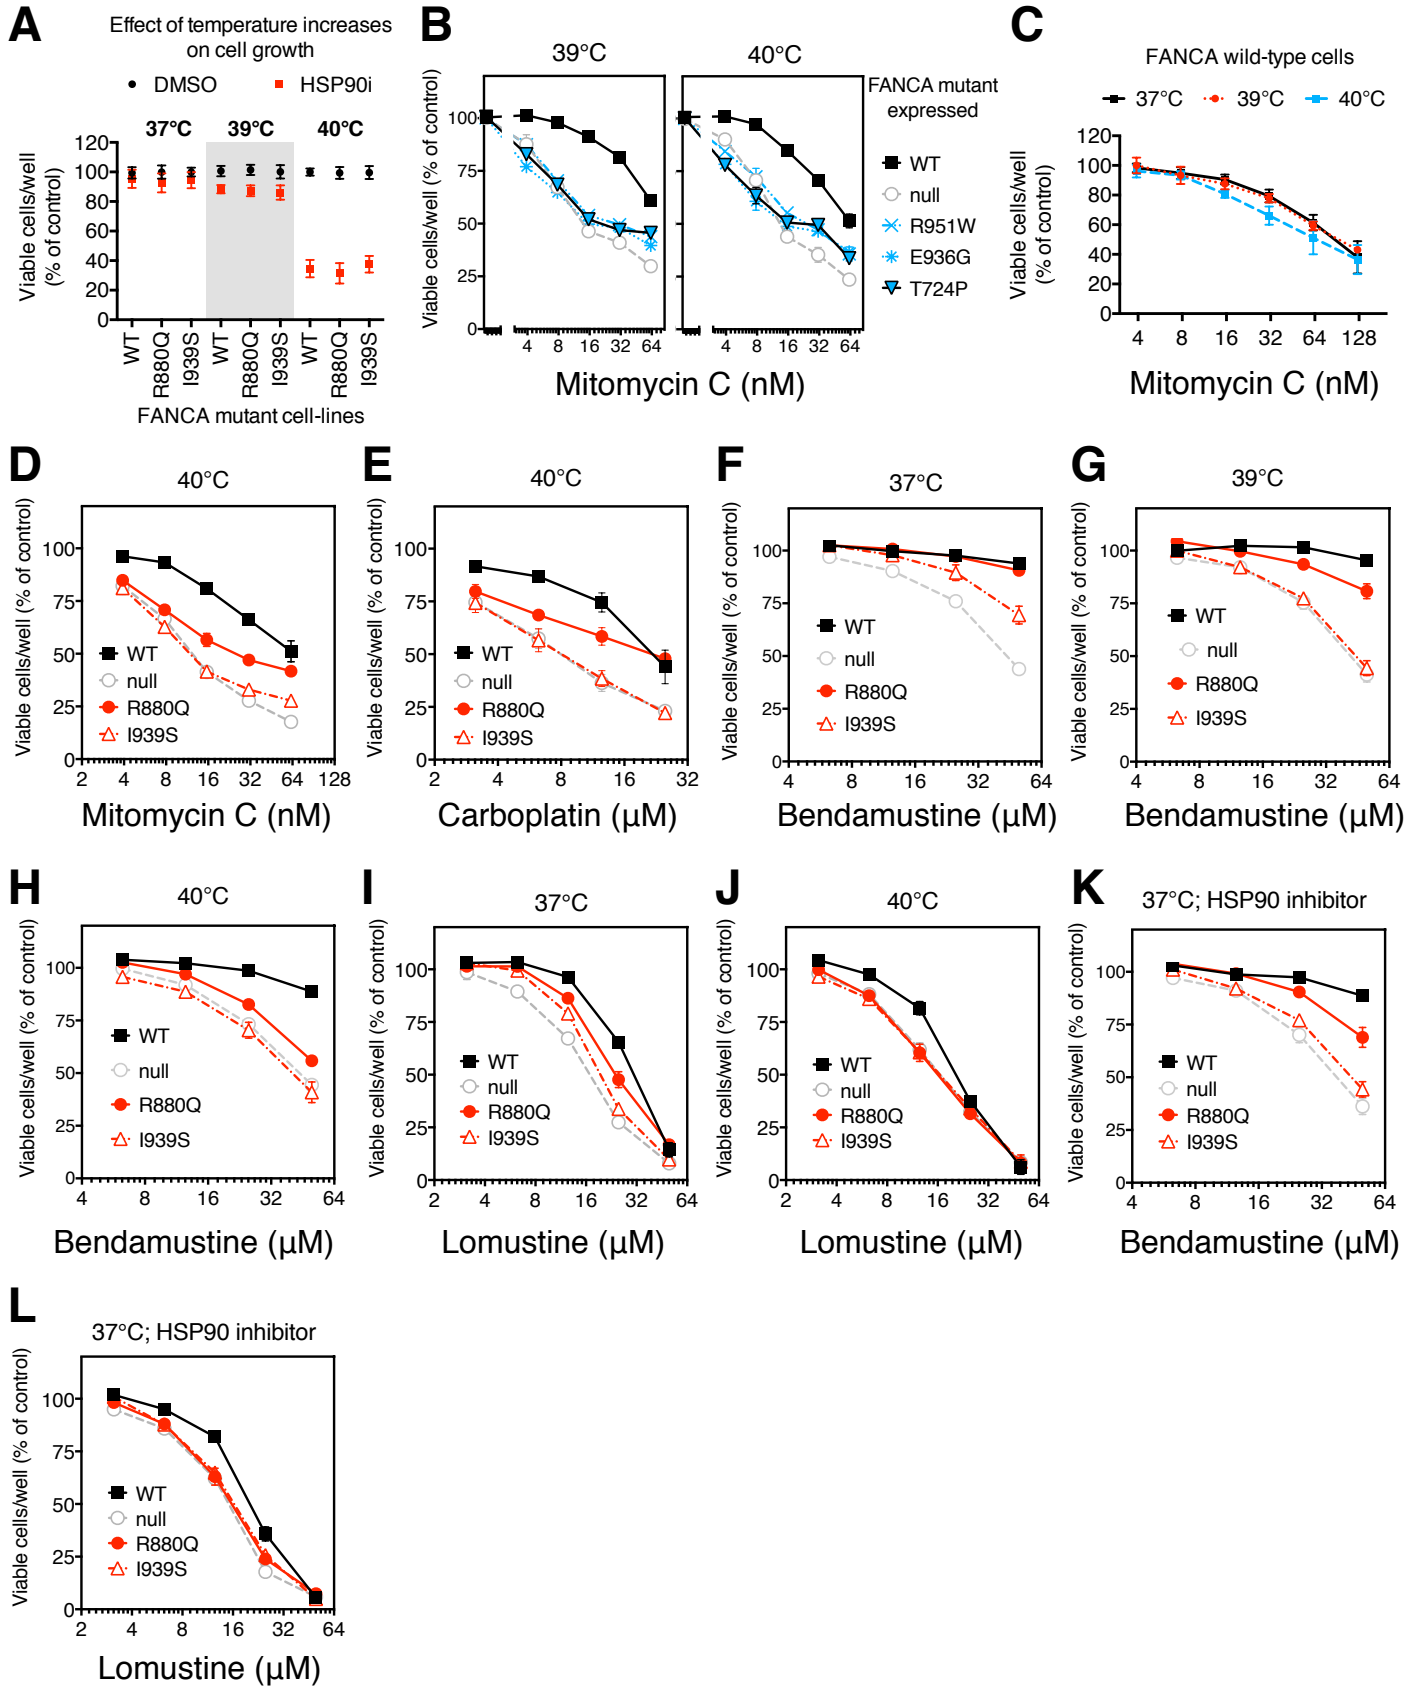

Supplement: NIHMS846502-supplement-4.pdf [file NIHMS846502-supplement-4.pdf]
