# Supplementary material
Source: PubMed Central journal article supplement (PMC5325763)

**Figure S5. Determining the molecular mechanism of anemia-prevention by compensatory mutation (related to Figure 5)**

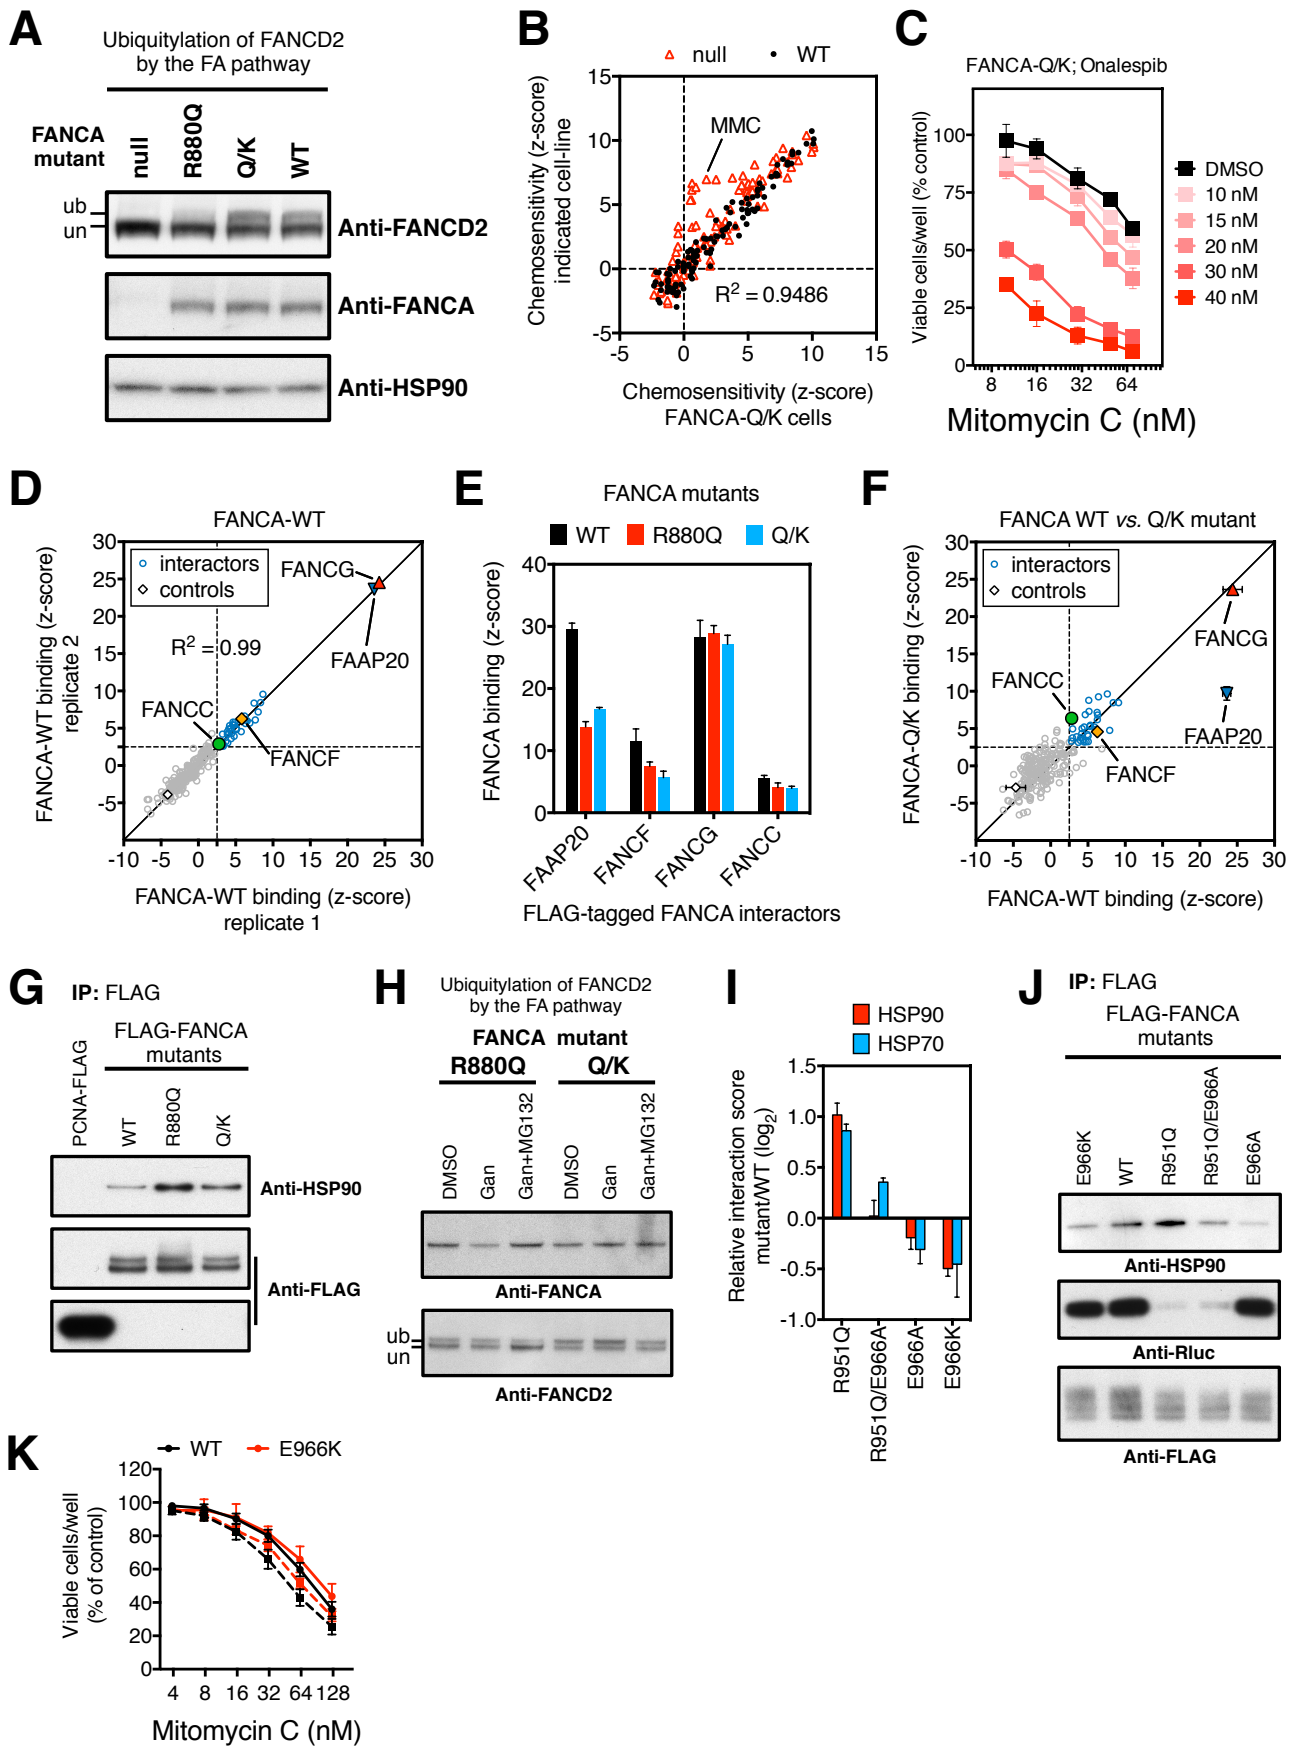

Supplement: NIHMS846502-supplement-5.pdf [file NIHMS846502-supplement-5.pdf]
